# Supplementary material for: Stable preparations of tyrosine hydroxylase provide the solution structure of the full-length enzyme
Source: PubMed Central journal article supplement (PMC4961952; doi:10.1038/srep30390), 2016-07-27
Supplement: srep30390-s1.pdf [file srep30390-s1.pdf]

## Supplementary Information

# Stable preparations of tyrosine hydroxylase provide the solution structure of the full-length enzyme

Maria T. Bezem<sup>†</sup>, Anne Baumann<sup>†</sup>, Lars Skjærven, Romain Meyer, Petri Kursula, Aurora Martinez, Marte I. Flydal

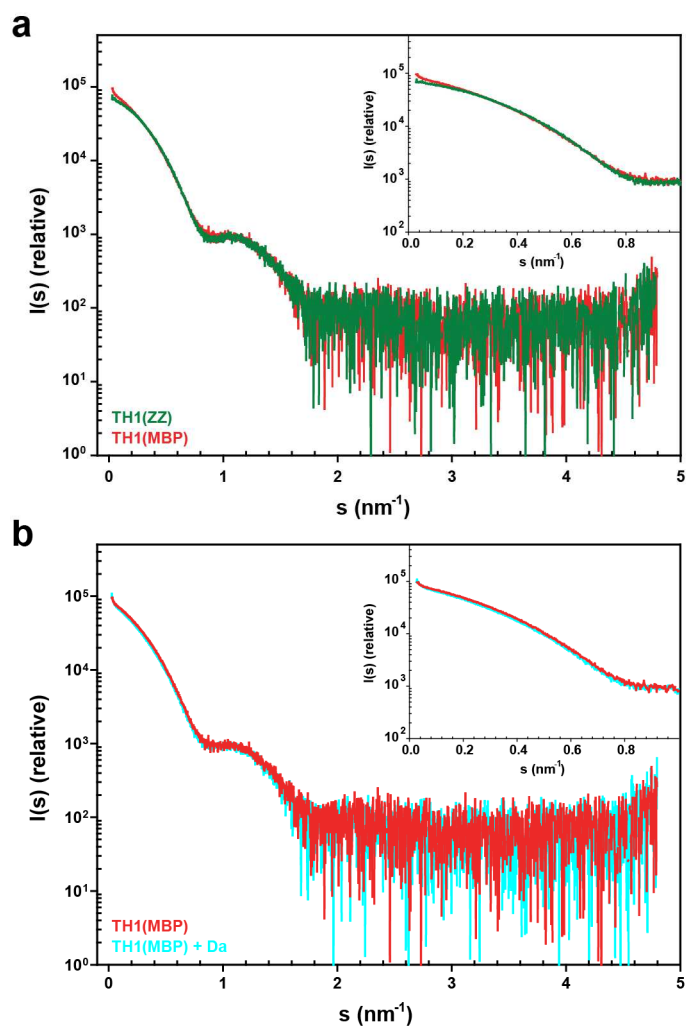

**Supplementary Figure S1:** Small-angle X-ray scattering. (a) SAXS curves of TH1(ZZ) (green) and TH1(MBP) (red). (b) SAXS curves of TH1(MBP) (red) and TH1(MBP) in the presence (cyan) of stoichiometric amounts of DA.

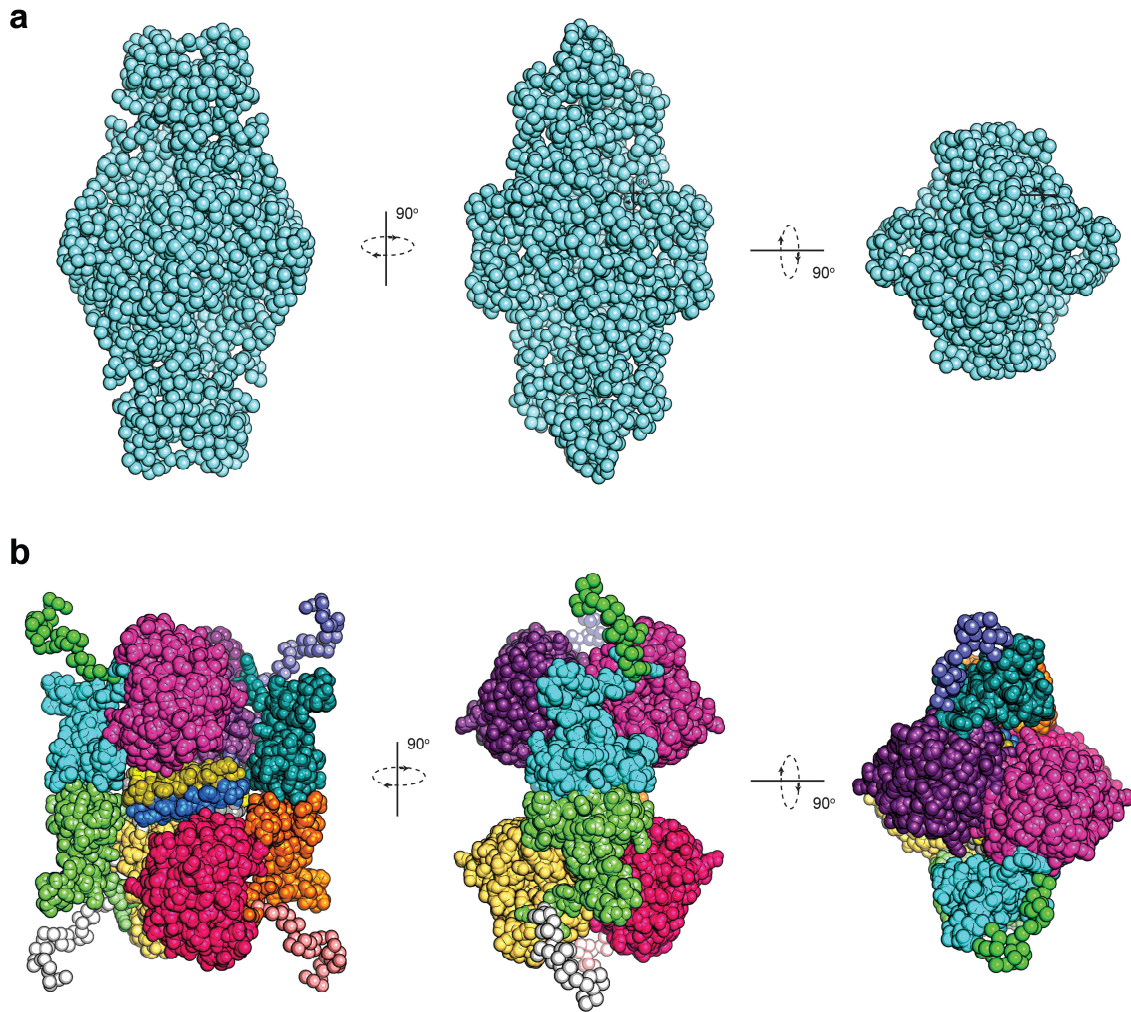

**Supplementary Figure S2:** Comparison of (a) *ab initio* model, and (b) hybrid model of TH1(ZZ). Dimensions of the *ab initio* model are  $\sim 17 \times 9 \times 9$  nm and the model yields a fit to the experimental scattering data with a  $\chi^2$  value of 0.74. Dimensions of hybrid model are  $15 \times 12 \times 10$  (with a  $\chi^2$  of 1.55). Coloring represent the various structural elements and domains of TH1 used in the rigid body modeling protocol.

a

MPTPDATTPQAKGFRRRAVSELDKQAEAIMSPRFIGRRQSLIEDARKEREAAVAAAAAVPSEPGDPLEA ACT-DOMAIN

b

|           |                       |    |
|-----------|-----------------------|----|
|           | 40                    | 50 |
| TH_HUMAN  | GRRQSLIEDARKEREA      |    |
| TH_RAT    | GRRQSLIEDARKEREA      |    |
|           | * : . * * * * : : . * |    |
| PAH_RAT   | GQETSYIEDNSNQNGAI     |    |
| PAH_HUMAN | GQETSYIEDNCNQNGAI     |    |
|           | 20                    | 30 |

**Supplementary Figure S3:** The N-terminal region of TH1. (a) The N-terminal region of TH1 includes residues 1-70, for which the structure is unknown. The N-terminal tail is shown in gray and the Ala-rich segment in red (preceding the ACT-domain). (b) Sequence alignment of TH1 and human phenylalanine hydroxylase (PAH) at positions Gly36-Ala52 (for TH1), and Gly19-Ile35 (for PAH) (see main text for details).

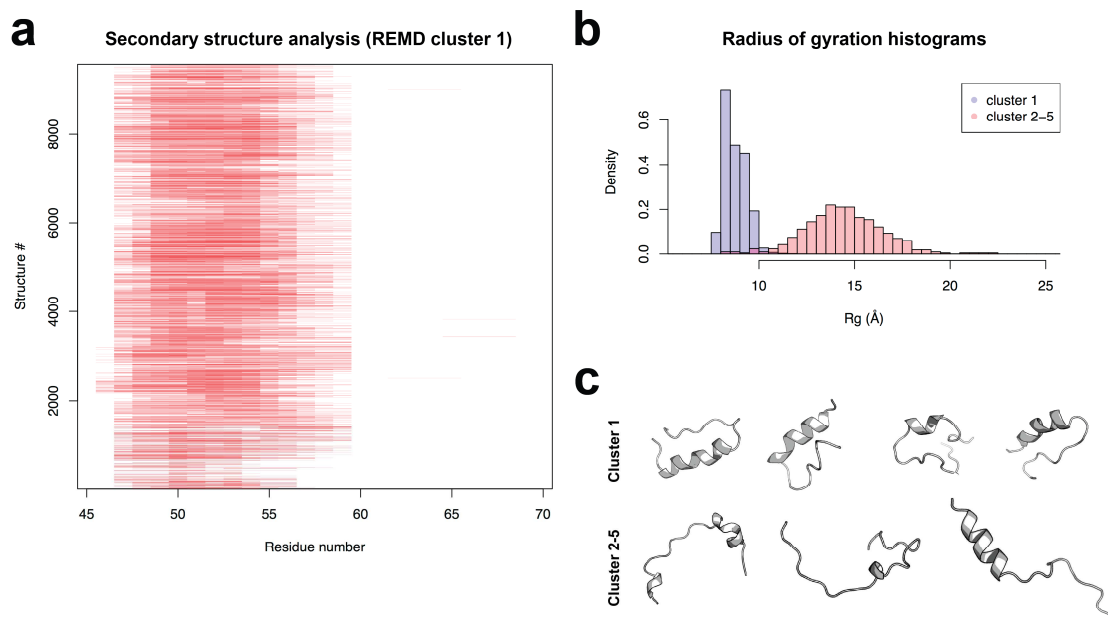

**Supplementary Figure S4:** Replica exchange molecular dynamics (REMD) simulations summary. (a) Schematic representation of the  $\alpha$ -helix propensity for each of the resulting conformers in cluster 1 obtained from REMD simulations. Red colors depict presence of  $\alpha$ -helix while white color depicts no secondary structure element. (b) Histogram of the radius of gyration for conformers in cluster 1 (blue bars) and clusters 2-5 (red bars). For comparison probability densities (so that the histogram has a total area of one) are plotted instead of frequencies. (c) Example conformers from cluster 1 (first row) and clusters 2-5 (second row).

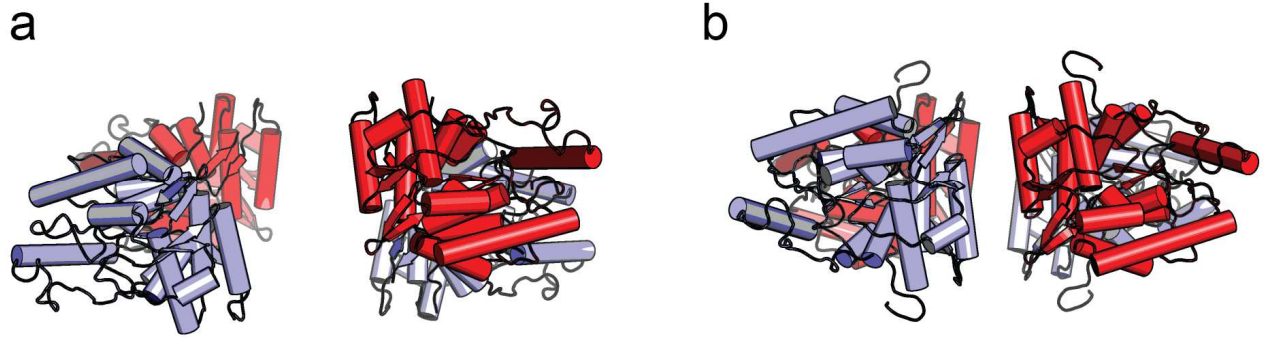

**Supplementary Figure S5:** Comparison of the configuration of catalytic domains in (a) the SAXS-derived hybrid model of TH1(ZZ) and (b) crystal structure of rat TH (PDB ID 1TOH). Only the catalytic domains are shown for illustration of the out-of-plane (SAXS) and in-plane (crystal) configurations.
